# Supplementary material for: S-doped C3N5 derived from thiadiazole for efficient photocatalytic hydrogen evolution
Source: Royal Society of Chemistry journal article supplement (doi:10.1039/d3ta00318c), 2023-01-01
Supplement: d3ta00318c1.pdf [file d3ta00318c1.pdf]

## Electronic Supplementary Information

### S-doped C<sub>3</sub>N<sub>5</sub> derived from thiadiazole for efficient photocatalytic hydrogen evolution

Xinwei Guan,<sup>a</sup> Mohammed Fawaz,<sup>a</sup> Ranjini Sarkar,<sup>b</sup> Chun-Ho Lin,<sup>c</sup> Zhixuan Li,<sup>a</sup> Zhihao Lei,<sup>a</sup> Nithinraj Panangattu Dharmarajan,<sup>a</sup> Prashant Kumar,<sup>a</sup> Xiangwei Zhang,<sup>a</sup> Jae-Hun Yang,<sup>a</sup> Long Hu,<sup>c</sup> Tom Wu,<sup>c, d</sup> Sudip Chakraborty,<sup>b</sup> Jiabao Yi,<sup>\*a</sup> and Ajayan Vinu<sup>\*a</sup>

<sup>a</sup>. Global Innovative Centre for Advanced Nanomaterials, School of Engineering, College of Engineering, Science and Environment, The University of Newcastle, Callaghan, NSW, 2308 Australia

E-mail: jiabao.yi@newcastle.edu.au; ajayan.vinu@newcastle.edu.au.

<sup>b</sup>. Materials Theory for Energy Scavenging (MATES) Lab, Harish-Chandra Research Institute (HRI) Allahabad, HBNI, Chhatnag Road, Jhunsi, Prayagraj (Allahabad), 211019 India

<sup>c</sup>. School of Materials Science and Engineering, University of New South Wales (UNSW), Sydney, NSW, 2052 Australia

<sup>d</sup>. Department of Applied Physics, The Hong Kong Polytechnic University, Hung Hom, Hong Kong, 999077 P. R. China

## Experimental Section

### Materials Synthesis:

5-ATDA (C<sub>2</sub>H<sub>3</sub>N<sub>3</sub>S<sub>2</sub>) (purity 95%), hydrogen hexachloroplatinate (IV) solution (H<sub>2</sub>PtCl<sub>6</sub>, 8 wt% in H<sub>2</sub>O), and n-butanol (CH<sub>3</sub>(CH<sub>2</sub>)<sub>3</sub>OH, 99.8%) were purchased from Sigma-Aldrich and ACS reagent grade. All the chemicals were used without further purification. The SCNs and different precursors-based g-CN were prepared by a simple calcination method under different temperatures. In brief, 3 g of precursors were directly calcined in a tube furnace with a nitrogen flow. The obtained bulk samples were well-grounded before measurements.

### Characterization:

XRD patterns were characterized by a Panalytical Empyrean X-ray diffractometer equipped with Cu-K $\alpha$  radiation ( $\lambda = 1.5418 \text{ \AA}$ ) and Galipix Detector at 40 kV and 40 mA. SEM images were recorded by the JEOL JSM-7900F, and TEM analysis was taken by the JEOL JEM-2100F. FT-IR data were measured by a Perkin Elmer Frontier FTIR/NIR spectrometer by a KBr disk method. XPS measurements were conducted by a VG ESCALAB MK2 system with

monochromatized Al K $\alpha$  radiation under a pressure of  $5.0 \times 10^{-7}$  Pa. NEXAFS spectra were carried out from the Soft X-ray Spectroscopy Beamline at the Australian Synchrotron. The beamline has a hemispherical electron analyzer and a microchannel plate detector to measure the total and partial electron yield simultaneously. The PL spectra measurements were performed at room temperature using a custom laser PL spectroscopy system (Crystal Laser, Model BLC-050-405). The laser pulse width was 130 fs, and the repetition rate was 100 MHz. The excitation wavelength for both PL and TRPL measurements is 370 nm. UV-Vis spectra were conducted by the Perkin Elmer Lambda 365 UV/VIS. Perkin Elmer EA 2400 Elemental Analyzer determined the samples' quantification of C, N, and S. For measuring porous textures, all samples were firstly degassed under  $10^{-3}$  Torr vacuum at 200 °C for twelve hours and then conducted the N<sub>2</sub> adsorption-desorption isotherm analysis at liquid nitrogen temperature by ASAP 2040. Parameters like specific surface area, total pore volume, and pore size were systematically recorded. The thermogravimetric analysis was conducted by the Perkin Elmer STA 8000 with a ramping rate of 10 °C min<sup>-1</sup> and an N<sub>2</sub> flow rate of 20 mL min<sup>-1</sup>.

#### **Photoelectrochemical cell preparation and method:**

50 mg of carbon nitride powder mixed with 50  $\mu$ l of 10 wt% Nafion solution and a few drops of ethanol and grounded in an agate mortar to form a uniform paste. A 1 cm<sup>2</sup> electrode is prepared by masking an FTO-coated glass substrate with scotch tape (3 sides) and subsequently applying a thin layer of prepared carbon nitride paste by the doctor blade technique. The prepared electrode is dried at room temperature. After peeling the scotch tape, the exposed FTO surface is coated with epoxy resin to get the working electrode.

Photoelectrochemical measurement, Mott-Schottky measurement, and electrochemical impedance spectroscopy (EIS) were measured in a three-electrode system where FTO-supported CN film, Platinum spring electrode, and Ag/AgCl (3M KCl) act as a working electrode, counter electrode and the reference electrode respectively, in a 0.2 M Na<sub>2</sub>SO<sub>4</sub>

electrolyte solution and recorded using a CHI-Potentiostat. PEC measurements in a three-electrode configuration are carried out after purging argon gas for 20 minutes under the illumination of a 300 W Xenon lamp ( $\lambda > 400$  nm) at 0 V (vs Ag/AgCl), where the light beam is irradiated on the glass side of the working electrode. The material's photocurrent density curve (chronoamperometry) is measured by illuminating the photoelectrode at regular intervals of 20 seconds. For Mott-Schottky, the potential range of  $-0.3$  V to  $1$  V (vs. Ag/AgCl) was used. Electrochemical Impedance Spectra (EIS) measurements were recorded by sweeping the frequency from  $10$  KHz to  $10$  mHz with a  $10$  mV AC excitation signal using the same electrochemical configuration.

### **Photocatalytic HER:**

The photocatalytic reactions of SCNs were conducted in a top-irradiated Pyrex reactor, which is connected to the closed gas circulation and evacuation system. In typical experiments,  $100$  mg of the SCN samples were dispersed in  $100$  mL of 10-vol% TEOA aqueous solution with continuing magnetic stirring. To thoroughly remove the air in the system, Ar gas was passed into the system and evacuated multiple times, with a final pressure of around  $40$  Torr. Afterwards, simulated solar light with one sun power was illuminated on the reactor using the Newport Class ABB solar simulator with  $450$  W Xe lamp and  $1.5$  G air-mass filter. The evolved  $H_2$  gas was analyzed by an in-situ auto-injection system periodically, which is composed of a gas chromatograph (PerkinElmer Clarus 580).

### **Computational methodology:**

Plane-wave pseudopotential (PW-PP) based DFT calculations are carried out using Quantum Espresso package.<sup>[1]</sup> GGA-PBE functional<sup>[2]</sup> is employed with ultrasoft pseudopotential (USPP)<sup>[3]</sup> considering the plane-wave cut-off energy of  $50$  Ry ( $680$  eV), and  $3 \times 3 \times 1$  and  $15 \times 15 \times 1$  k-grid points for geometry optimization and electronic structure calculations. The convergence threshold of energy and force was set to  $1.36 \times 10^{-5}$  eV and

0.025 eV/Å (which is  $2.15 \times 10^{-4}$  eV/Å per atom for SCN-9 and  $1.61 \times 10^{-4}$  eV/Å per atom for SCN-12), respectively.

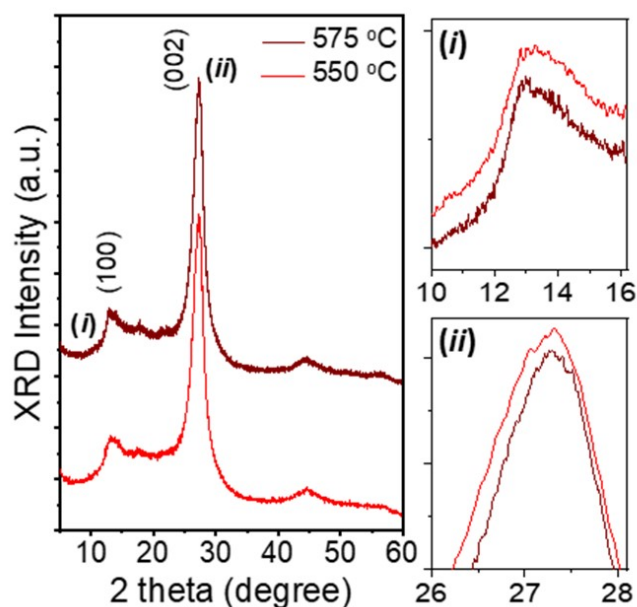

**Fig. S1.** Powder XRD patterns of SCN-550 and SCN-575. The enlarged (100) and (002) reflection peaks indicate a crystallinity reduction when enhancing the calcination temperature to 575 °C.

**Table S1.** Elemental composition of SCNs obtained from CHNS analysis (wt%).

| Samples | N(%)  | C (%) | H(%) | S (%) | C:N:S                  |
|---------|-------|-------|------|-------|------------------------|
| SCN-350 | 60.45 | 30.51 | 2.61 | 3.59  | $C_3N_{5.09}S_{0.13}$  |
| SCN-450 | 60.07 | 32.44 | 2.20 | 1.53  | $C_3N_{4.76}S_{0.05}$  |
| SCN-500 | 59.94 | 33.27 | 2.08 | 0.35  | $C_3N_{4.63}S_{0.011}$ |
| SCN-550 | 59.59 | 33.43 | 2.01 | 0.35  | $C_3N_{4.58}S_{0.01}$  |
| SCN-575 | 59.55 | 33.47 | 1.87 | 0.09  | $C_3N_{4.57}S_{0.003}$ |

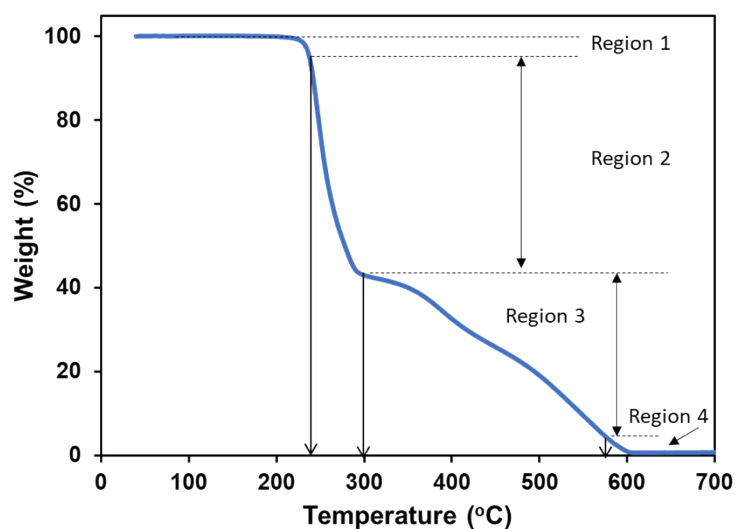

**Fig. S2.** TGA curve of 5-ATDT. A small weight loss between 30 and 237 °C corresponds to the removal of the water adsorbed (region 1). The melting point of 5-ATDT is 237 °C, and it is decomposed to  $\text{CH}_4\text{N}_2\text{S}$  and  $\text{N}\equiv\text{C-SH}$  after melting in region 2 (Fig. 2). Finally, the carbon nitrides are completely decomposed at 600 °C.

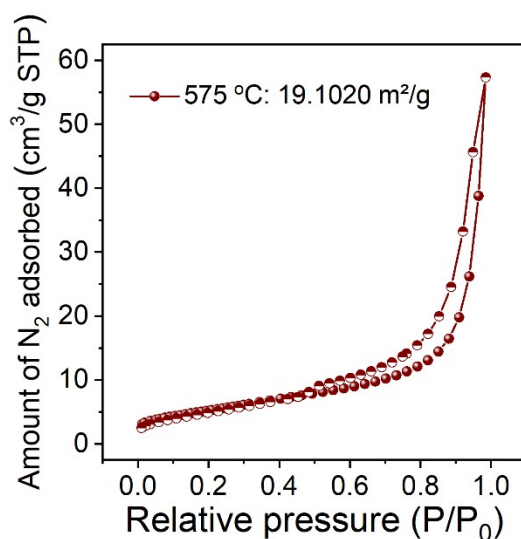

**Fig. S3.**  $\text{N}_2$  adsorption-desorption isotherms of SCN-575. Compared to SCN-550, the specific surface area of SCN-575 is almost double due to partial material vaporization and  $\text{H}_2\text{S}$  release during the carbonation process.

**Table S2.** N-N, C-N, C-S, and N-S bond lengths within the SCNs monolayer.

| <b>Bonds</b> | <b>Bond length (Å)</b>                                  |                                                                         |
|--------------|---------------------------------------------------------|-------------------------------------------------------------------------|
|              | <b>Within unit A<br/>(C<sub>3</sub>N<sub>4.8</sub>)</b> | <b>Within unit B<br/>(C<sub>3</sub>N<sub>4.2</sub>S<sub>0.06</sub>)</b> |
| N8-N5        | 1.40                                                    | -                                                                       |
| N5-N7        | 1.42                                                    | -                                                                       |
| N5-C4        | 1.40                                                    | -                                                                       |
| S-C4         | -                                                       | 1.88                                                                    |
| S-N7         | -                                                       | 2.02                                                                    |
| N7-C2        | 1.31                                                    | 1.27                                                                    |
| C2-N6        | 1.36                                                    | 1.38                                                                    |
| N6-C1        | 1.32                                                    | 1.31                                                                    |
| C1-N4        | 1.35                                                    | 1.35                                                                    |
| N4-C3        | 1.33                                                    | 1.33                                                                    |
| C3-N1        | 1.37                                                    | 1.39                                                                    |
| N1-C4        | 1.36                                                    | 1.35                                                                    |
| C4-N3        | 1.31                                                    | 1.29                                                                    |
| C3-N2        | 1.33                                                    | 1.34                                                                    |
| N2-C5        | 1.35                                                    | 1.33                                                                    |
| C5-N3        | 1.36                                                    | 1.37                                                                    |

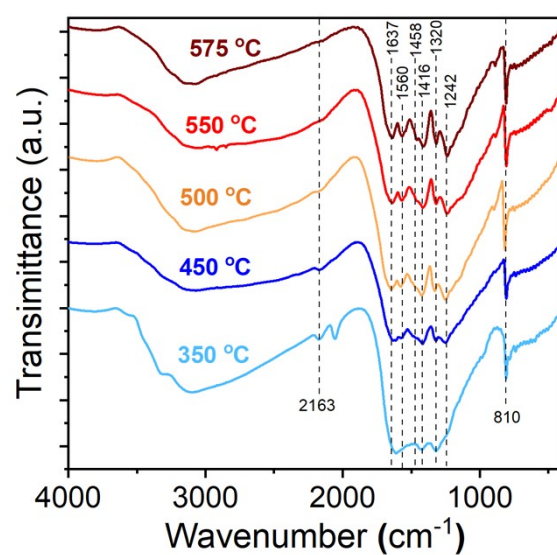

**Fig. S4.** FT-IR spectra of SCN samples calcinated at different temperatures.

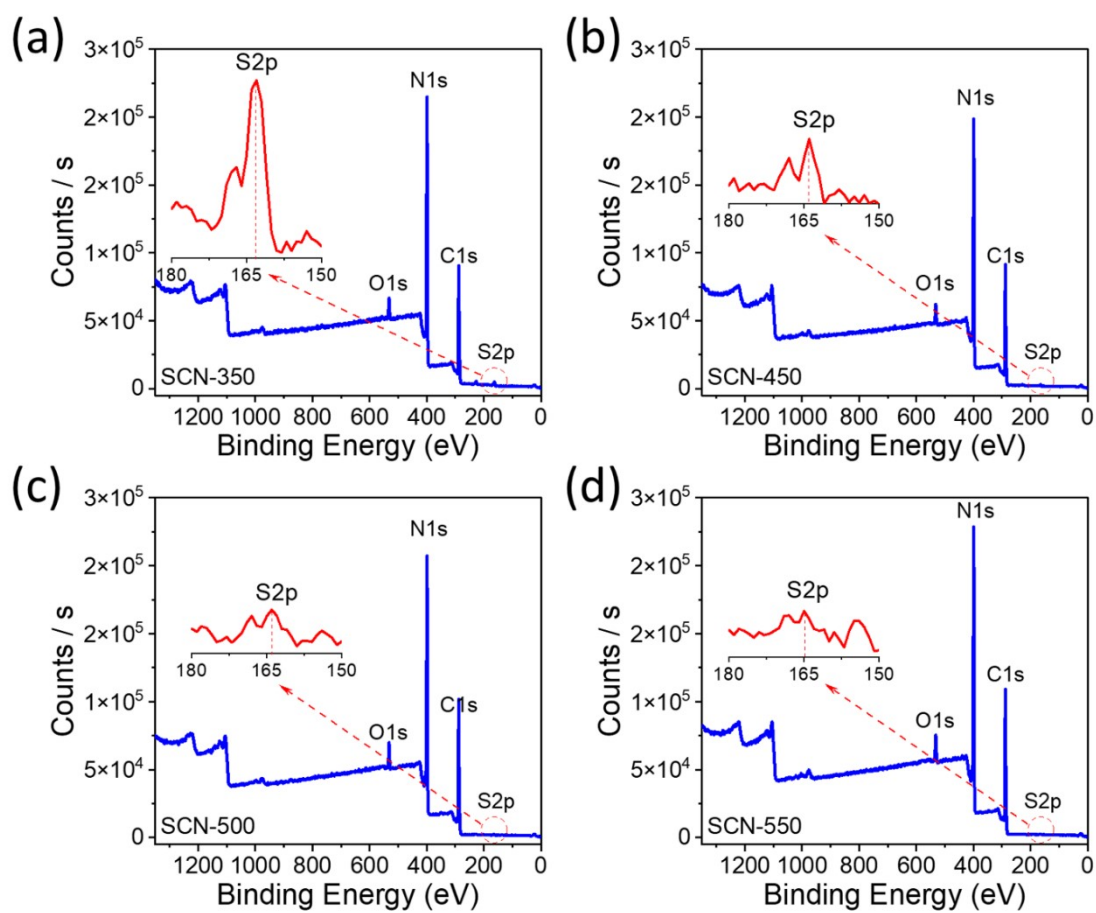

**Fig. S5.** Elemental survey scan of SCNs.

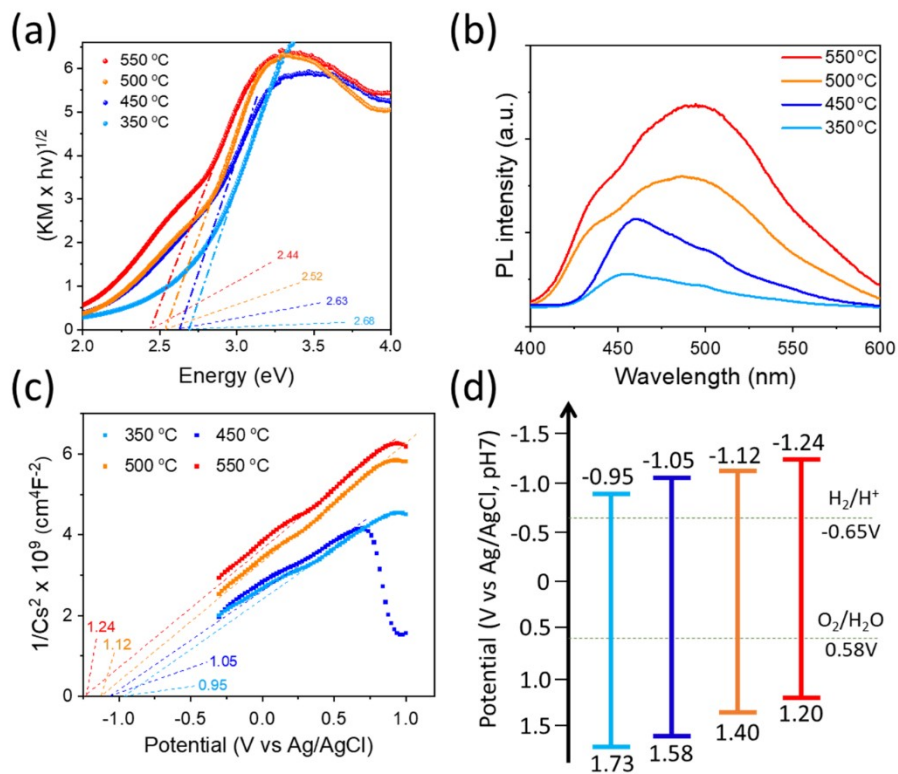

**Fig. S6.** a) Kubelka-Munk plots of SCNs derived from the UV-vis spectra. b) PL plots of SCNs. c) Mott-Schottky plots measured at 2700 Hz and d) their electronic band gap structures.

**Table S3.** Lifetimes of SCN samples.

|         | $\tau_1$ (ns) | $A_1$  | $\tau_2$ (ns) | $A_2$  | $\tau_{\text{average}}$ (ns) |
|---------|---------------|--------|---------------|--------|------------------------------|
| SCN-350 | 1.3           | 0.5131 | 4.7           | 0.5089 | 2.99301                      |
| SCN-450 | 2.2           | 0.7177 | 8.5           | 0.2888 | 4.00769                      |
| SCN-500 | 5.7           | 0.8309 | 23.1          | 0.2057 | 9.15281                      |
| SCN-550 | 7.1           | 0.8229 | 28.5          | 0.2217 | 11.64182                     |
| SCN-575 | 6.2           | 0.8096 | 26.3          | 0.2213 | 10.5148                      |

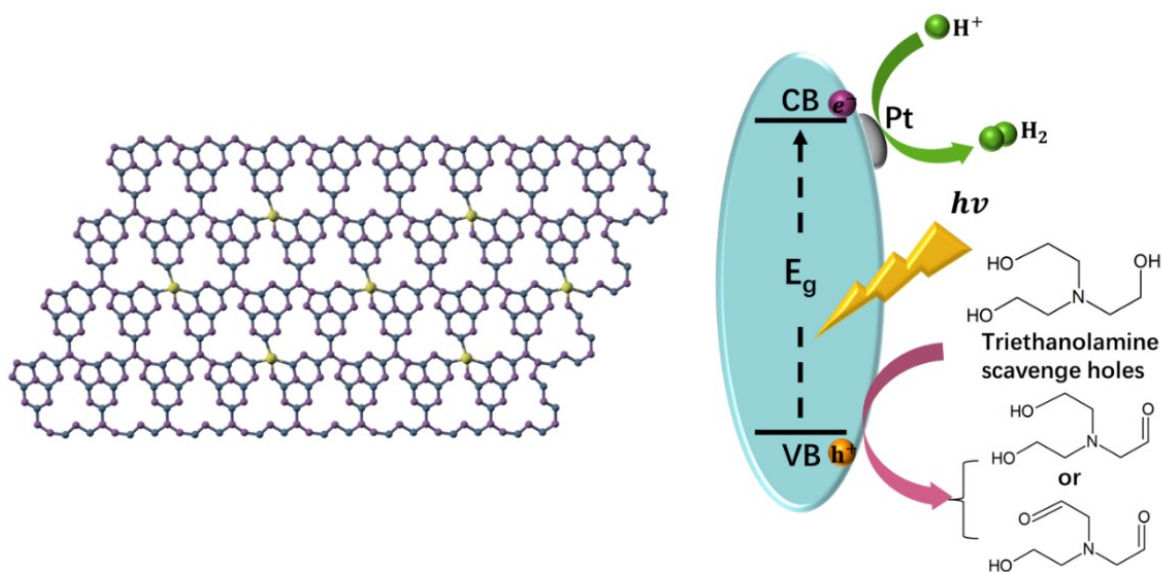

**Fig. S7.** The mechanism of photocatalytic H<sub>2</sub> evolution reaction in SCNs.

**Table S4.** The evolution rate of H<sub>2</sub> of SCNs in the photocatalytic water splitting reaction.

|         | H <sub>2</sub> evolution rate<br>( $\mu\text{mol h}^{-1} \text{g}^{-1}$ ) | Amount of evolved H <sub>2</sub> in 5 hours<br>( $\mu\text{mol h}^{-1} \text{g}^{-1}$ ) |
|---------|---------------------------------------------------------------------------|-----------------------------------------------------------------------------------------|
| SCN-350 | 0                                                                         | 0                                                                                       |
| SCN-450 | 6.53                                                                      | 25.4                                                                                    |
| SCN-500 | 26.7                                                                      | 111.2                                                                                   |
| SCN-550 | 48.6                                                                      | 188                                                                                     |
| SCN-575 | 38.7                                                                      | 164.6                                                                                   |

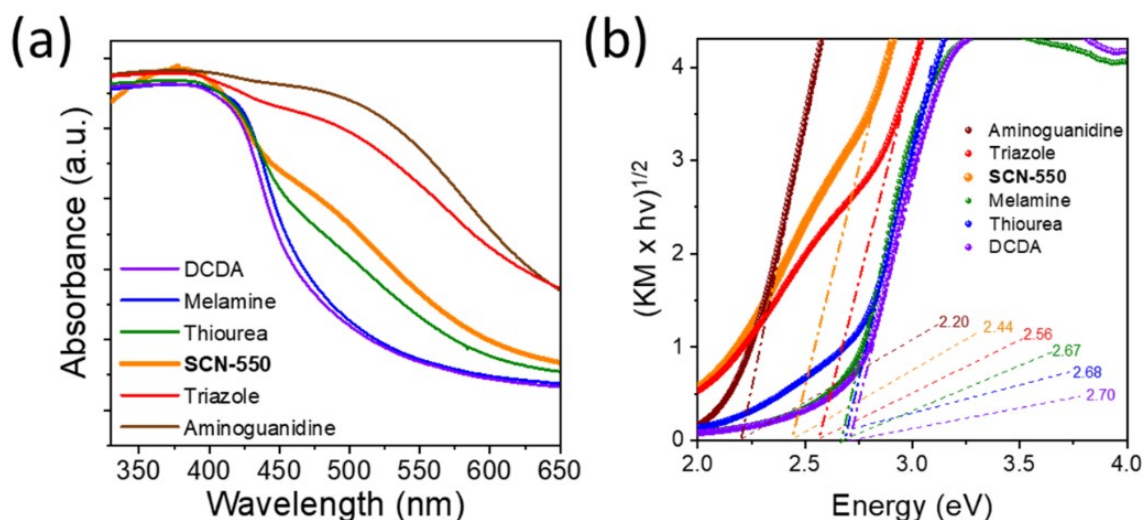

**Fig. S8.** a) UV-Vis spectra and b) the derived bandgaps of carbon nitriles derived from different precursors. From Fig. S8a, SCN-550 has an absorption bump in the range above 450 nm, and the bandgap of SCN-550 is also smaller than other precursors except for aminoguanidine. Therefore, SCN-550 can absorb more visible photons compared to other precursors.

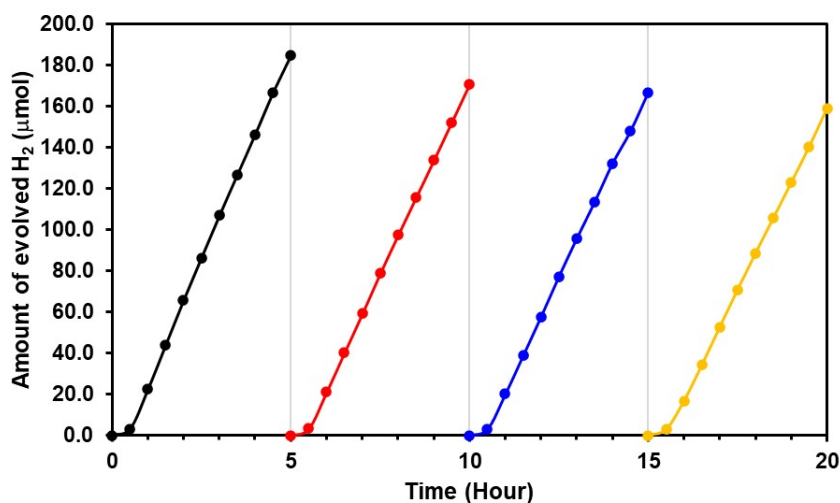

**Fig. S9.** The long-term stability test of SCN-550 for 20 hours with evacuation every 5 hours.

#### Reference:

- [1] P. Giannozzi, S. Baroni, N. Bonini, M. Calandra, R. Car, C. Cavazzoni, D. Ceresoli, G. L. Chiarotti, M. Cococcioni, I. Dabo, *J. Phys. Condens. Matter*. **2009**, *21*, 395502.
- [2] J. P. Perdew, K. Burke, M. Ernzerhof, *Phys. Rev. Lett.* **1996**, *77*, 3865.
- [3] D. Vanderbilt, *Phys. Rev. B* **1990**, *41*, 7892.
